# Supplementary material for: Capturing the geometry of the emissive state of a Cu(i) red emitter through strong intramolecular stacking forces
Source: Royal Society of Chemistry journal article supplement (doi:10.1039/c2dt32324a), 2012-11-22
Supplement: c2dt32324a.pdf [file c2dt32324a.pdf]

**Table S1** Crystallographic data and refinement details for compounds [Cu(flen)<sub>2</sub>]BF<sub>4</sub>·2CHCl<sub>3</sub> and [Cu(flen)<sub>2</sub>][CuI<sub>2</sub>].

| Compound reference                                                            | comp1                                                                                   | comp2                                                              |
|-------------------------------------------------------------------------------|-----------------------------------------------------------------------------------------|--------------------------------------------------------------------|
| Chemical formula                                                              | C <sub>56</sub> H <sub>40</sub> CuN <sub>4</sub> •2(CHCl <sub>3</sub> )•BF <sub>4</sub> | C <sub>56</sub> H <sub>40</sub> CuN <sub>4</sub> •CuI <sub>2</sub> |
| Formula Mass                                                                  | 1158.01                                                                                 | 1149.80                                                            |
| Crystal system                                                                | Monoclinic                                                                              | Orthorhombic                                                       |
| <i>a</i> /Å                                                                   | 25.2240(14)                                                                             | 13.848(4)                                                          |
| <i>b</i> /Å                                                                   | 15.1903(4)                                                                              | 17.564(5)                                                          |
| <i>c</i> /Å                                                                   | 20.1965(11)                                                                             | 19.573(2)                                                          |
| <i>α</i> /°                                                                   | 90.00                                                                                   | 90.00                                                              |
| <i>β</i> /°                                                                   | 137.614(11)                                                                             | 90.00                                                              |
| <i>γ</i> /°                                                                   | 90.00                                                                                   | 90.00                                                              |
| Unit cell volume/Å <sup>3</sup>                                               | 5216.7(12)                                                                              | 4761(2)                                                            |
| Temperature/K                                                                 | 293(2)                                                                                  | 293(2)                                                             |
| Space group                                                                   | <i>C2/c</i>                                                                             | <i>Pnna</i>                                                        |
| No. of formula units per unit cell, <i>Z</i>                                  | 4                                                                                       | 4                                                                  |
| No. of reflections measured                                                   | 25397                                                                                   | 34157                                                              |
| No. of independent reflections                                                | 4587                                                                                    | 4209                                                               |
| <i>R</i> <sub>int</sub>                                                       | 0.0262                                                                                  | 0.0270                                                             |
| Final <i>R</i> <sub>i</sub> values ( <i>I</i> > 2σ( <i>I</i> ))               | 0.0612                                                                                  | 0.0628                                                             |
| Final <i>wR</i> ( <i>F</i> <sup>2</sup> ) values ( <i>I</i> > 2σ( <i>I</i> )) | 0.1631                                                                                  | 0.1397                                                             |
| Final <i>R</i> <sub>i</sub> values (all data)                                 | 0.0697                                                                                  | 0.0812                                                             |
| Final <i>wR</i> ( <i>F</i> <sup>2</sup> ) values (all data)                   | 0.1709                                                                                  | 0.1531                                                             |

**Table S2** Cartesian coordinates used in the DFT calculation.

| Atom | x        | y        | z        |
|------|----------|----------|----------|
| C    | -1.44440 | 13.15328 | -7.03618 |
| H    | -2.30775 | 12.90872 | -6.79384 |
| Cu   | 3.72939  | 13.79477 | -3.40373 |
| N    | 5.32341  | 14.55595 | -4.47917 |
| C    | 5.31639  | 13.86267 | -5.76863 |
| H    | 5.69709  | 12.97707 | -5.66925 |
| H    | 5.85278  | 14.35483 | -6.40990 |
| C    | 8.42617  | 13.95837 | -5.36291 |
| H    | 7.90431  | 13.59532 | -6.04229 |
| N    | 3.06798  | 13.13399 | -5.22077 |
| C    | 7.85241  | 14.67383 | -4.32818 |
| C    | 6.48511  | 15.74171 | -2.70664 |
| C    | 6.42817  | 14.94422 | -3.95377 |
| C    | 0.99633  | 12.10667 | -4.49836 |
| C    | 1.84078  | 12.83732 | -5.46774 |
| C    | 3.89249  | 13.75937 | -6.26013 |
| H    | 3.54897  | 14.64345 | -6.46436 |
| H    | 3.86218  | 13.22619 | -7.07022 |
| C    | 8.66746  | 15.20549 | -3.29481 |
| C    | 0.93964  | 13.21404 | -6.60051 |
| C    | 1.35461  | 11.42766 | -3.35199 |
| H    | 2.24041  | 11.40488 | -3.07152 |
| C    | -0.32258 | 12.11426 | -4.95446 |
| C    | 7.82144  | 15.87386 | -2.31317 |
| C    | 9.81612  | 13.79735 | -5.35610 |
| H    | 10.22033 | 13.32189 | -6.04502 |
| C    | 5.47818  | 16.34628 | -1.99322 |
| H    | 4.59296  | 16.27641 | -2.26960 |
| C    | 10.03484 | 15.02017 | -3.31114 |
| H    | 10.56736 | 15.35891 | -2.62768 |
| C    | 10.59073 | 14.32293 | -4.35949 |
| H    | 11.51292 | 14.20749 | -4.39081 |
| C    | 0.36425  | 10.78056 | -2.62768 |
| H    | 0.58746  | 10.31725 | -1.85299 |
| C    | -1.30494 | 11.47779 | -4.20292 |

|   |          |          |          |
|---|----------|----------|----------|
| H | -2.19464 | 11.49754 | -4.47522 |
| C | 5.81113  | 17.06326 | -0.85365 |
| H | 5.14098  | 17.47796 | -0.35943 |
| C | 1.16100  | 13.89305 | -7.77956 |
| H | 2.01805  | 14.14369 | -8.03688 |
| C | 8.14750  | 16.58021 | -1.16271 |
| H | 9.02974  | 16.65464 | -0.88361 |
| C | -0.36453 | 12.82061 | -6.22609 |
| C | -1.22356 | 13.83836 | -8.18392 |
| H | -1.94643 | 14.07381 | -8.71898 |
| C | -0.93898 | 10.82005 | -3.04974 |
| H | -1.59183 | 10.39016 | -2.54599 |
| C | 7.12676  | 17.16656 | -0.44521 |
| H | 7.32979  | 17.64050 | 0.32948  |
| C | 0.05256  | 14.19382 | -8.57739 |
| H | 0.17540  | 14.63889 | -9.38475 |
| C | 8.90317  | 13.15328 | 0.22873  |
| H | 9.76652  | 12.90872 | -0.01362 |
| N | 2.13536  | 14.55595 | -2.32829 |
| C | 2.14238  | 13.86267 | -1.03882 |
| H | 1.76168  | 12.97707 | -1.13821 |
| H | 1.60599  | 14.35483 | -0.39755 |
| C | -0.96740 | 13.95837 | -1.44454 |
| H | -0.44554 | 13.59532 | -0.76516 |
| N | 4.39079  | 13.13399 | -1.58668 |
| C | -0.39364 | 14.67383 | -2.47927 |
| C | 0.97366  | 15.74171 | -4.10081 |
| C | 1.03060  | 14.94422 | -2.85368 |
| C | 6.46244  | 12.10667 | -2.30909 |
| C | 5.61799  | 12.83732 | -1.33971 |
| C | 3.56628  | 13.75937 | -0.54732 |
| H | 3.90980  | 14.64345 | -0.34310 |
| H | 3.59659  | 13.22619 | 0.26277  |
| C | -1.20869 | 15.20549 | -3.51265 |
| C | 6.51913  | 13.21404 | -0.20695 |
| C | 6.10416  | 11.42766 | -3.45546 |
| H | 5.21836  | 11.40488 | -3.73593 |
| C | 7.78135  | 12.11426 | -1.85299 |
| C | -0.36267 | 15.87386 | -4.49428 |
| C | -2.35735 | 13.79735 | -1.45135 |
| H | -2.76156 | 13.32189 | -0.76243 |
| C | 1.98059  | 16.34628 | -4.81423 |
| H | 2.86581  | 16.27641 | -4.53785 |
| C | -2.57607 | 15.02017 | -3.49631 |
| H | -3.10859 | 15.35891 | -4.17978 |
| C | -3.13196 | 14.32293 | -2.44796 |
| H | -4.05415 | 14.20749 | -2.41664 |
| C | 7.09452  | 10.78056 | -4.17978 |
| H | 6.87131  | 10.31725 | -4.95446 |
| C | 8.76371  | 11.47779 | -2.60453 |
| H | 9.65341  | 11.49754 | -2.33223 |
| C | 1.64764  | 17.06326 | -5.95380 |
| H | 2.31779  | 17.47796 | -6.44802 |
| C | 6.29777  | 13.89305 | 0.97210  |
| H | 5.44072  | 14.14369 | 1.22943  |
| C | -0.68873 | 16.58021 | -5.64474 |
| H | -1.57097 | 16.65464 | -5.92385 |
| C | 7.82330  | 12.82061 | -0.58136 |
| C | 8.68233  | 13.83836 | 1.37647  |
| H | 9.40520  | 14.07381 | 1.91153  |
| C | 8.39775  | 10.82005 | -3.75771 |
| H | 9.05060  | 10.39016 | -4.26147 |
| C | 0.33201  | 17.16656 | -6.36224 |
| H | 0.12898  | 17.64050 | -7.13693 |
| C | 7.40621  | 14.19382 | 1.76994  |
| H | 7.28337  | 14.63889 | 2.57730  |

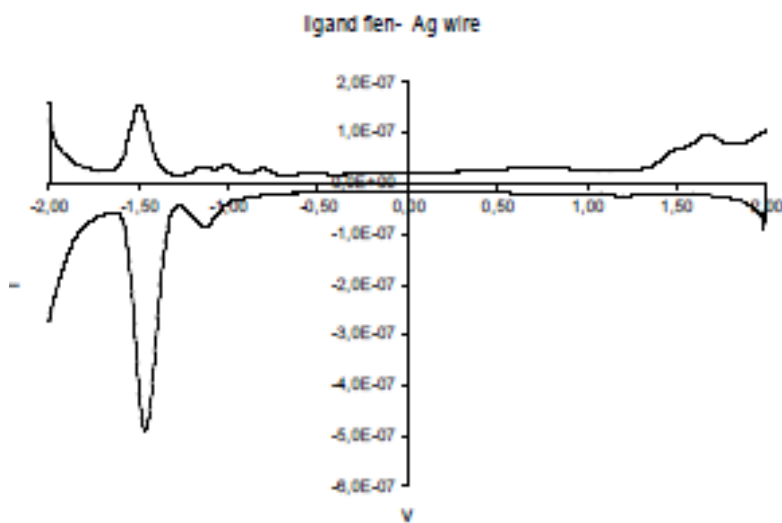

**Fig S1.** Differential pulse voltamogram of the **flen** ligand in  $\text{CH}_2\text{Cl}_2$  with a Ag wire pseudoreference electrode.

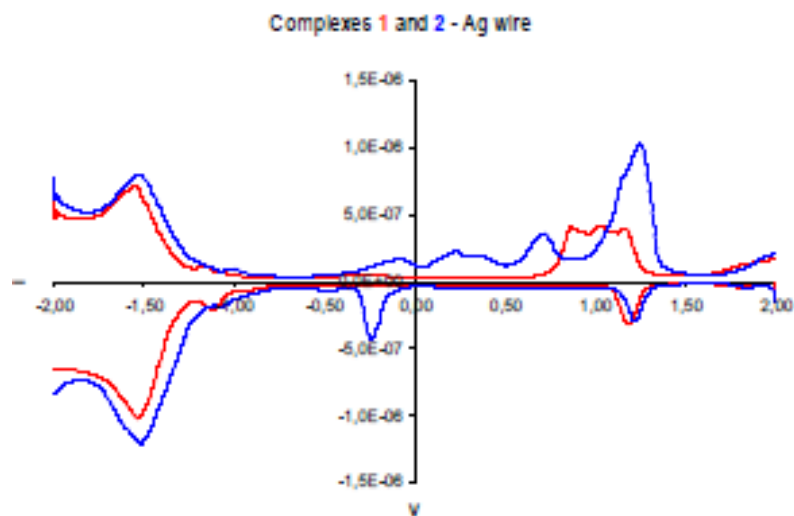

**Fig S2.** Differential pulse voltamogram of the two complexes in  $\text{CH}_2\text{Cl}_2$  with a Ag wire pseudoreference electrode.

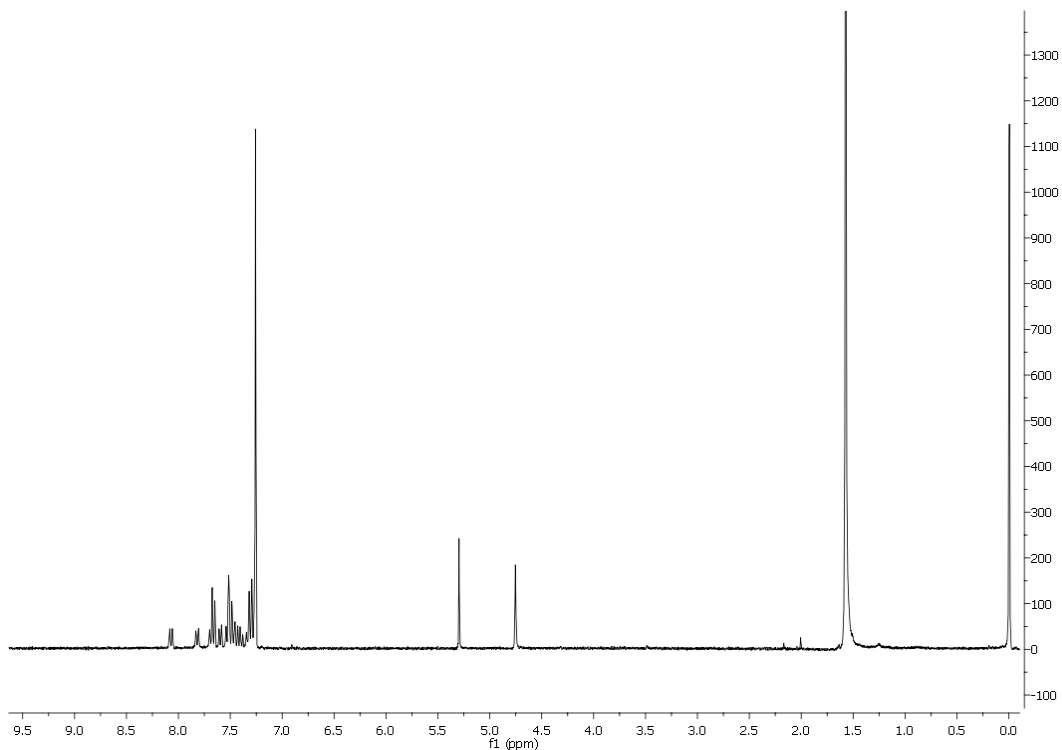

**Fig S3.**  $^1\text{H}$  NMR spectrum of compound **1** in  $\text{CDCl}_3$ . The peak at  $\sim \delta$  1.5 corresponds to the protons of cyclohexane molecule used for the precipitation of the solid portion used for the measurement while that at  $\sim$  5.3 corresponds to a dichloromethane solvent molecule.

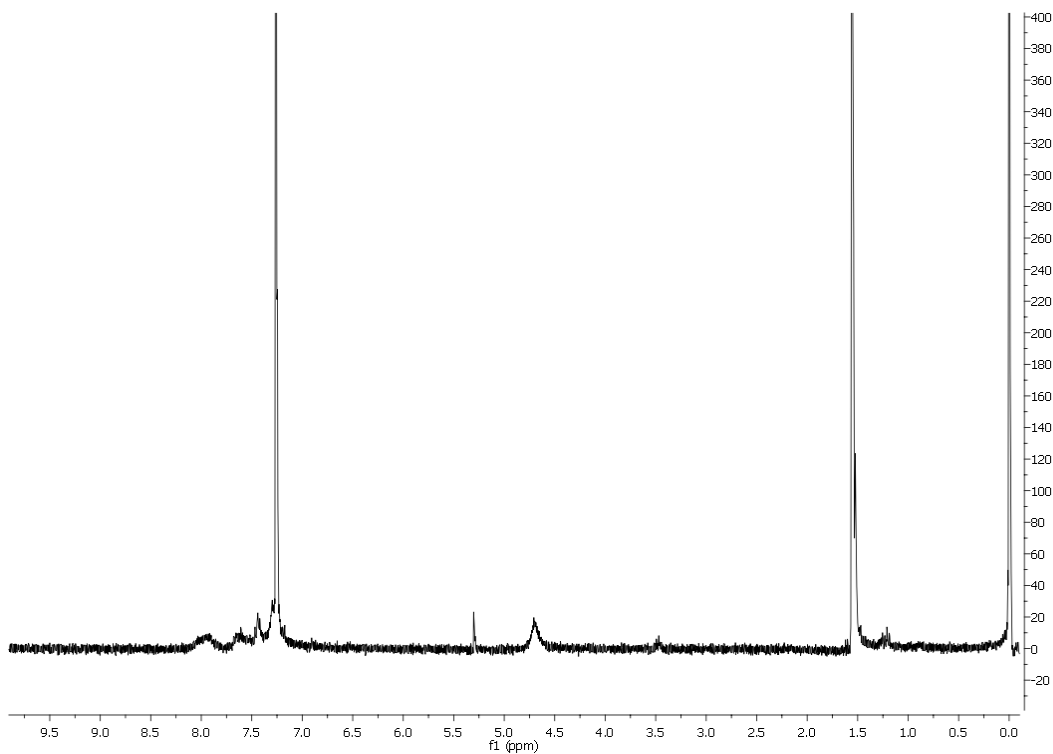

**Fig S4.**  $^1\text{H}$  NMR spectrum of compound **2** in  $\text{CDCl}_3$ .

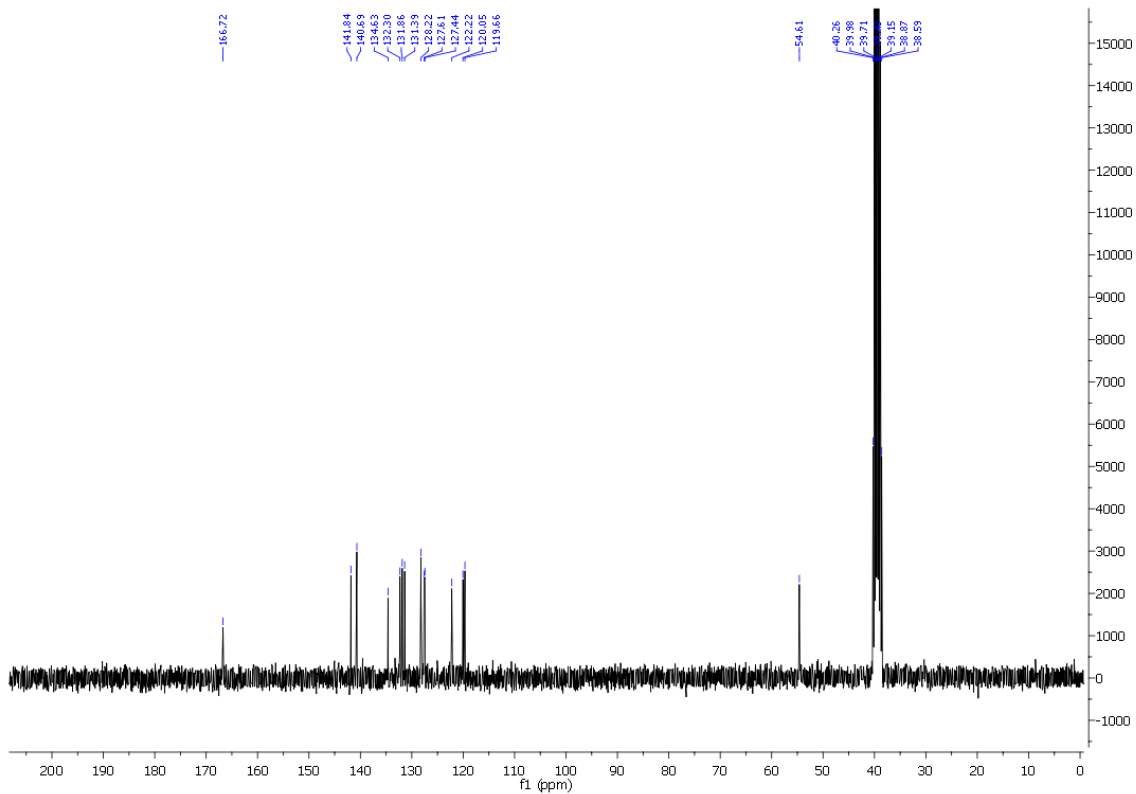

Fig S5.  $^{13}\text{C}$  NMR for compound 1 in  $\text{DMSO-d}_6$ .

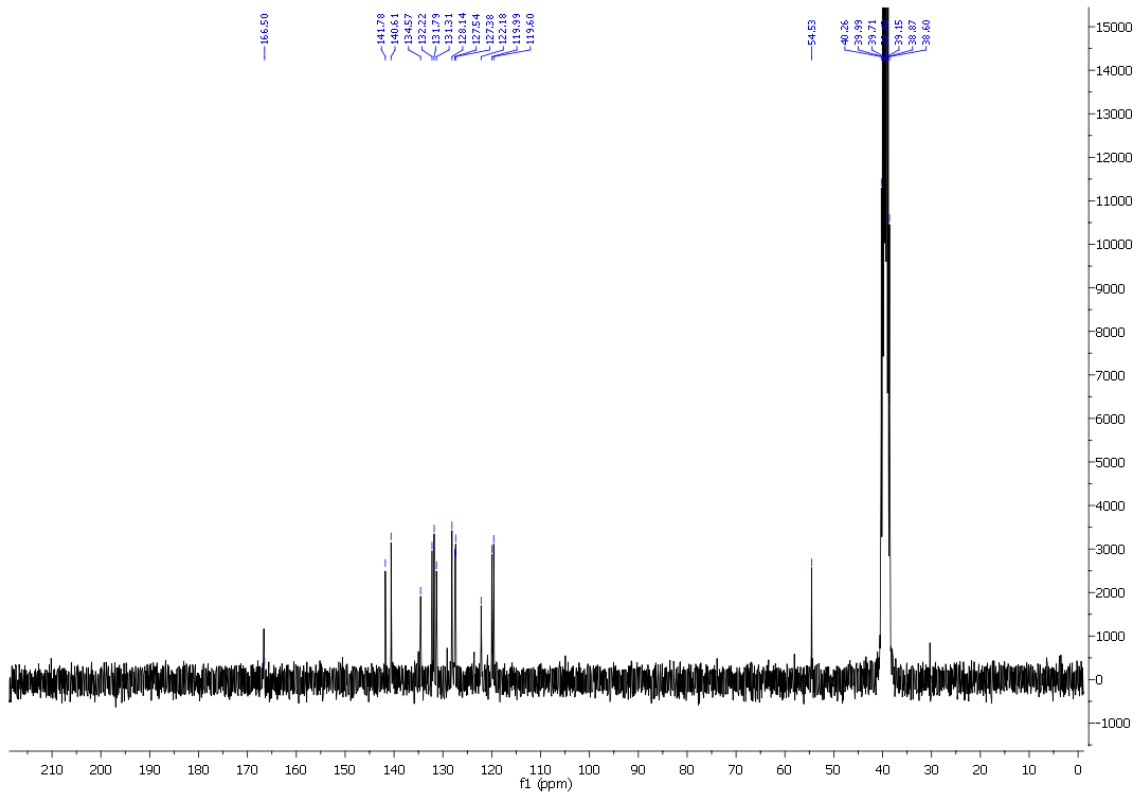

Fig S6.  $^{13}\text{C}$  NMR for compound 2 in  $\text{DMSO-d}_6$ .

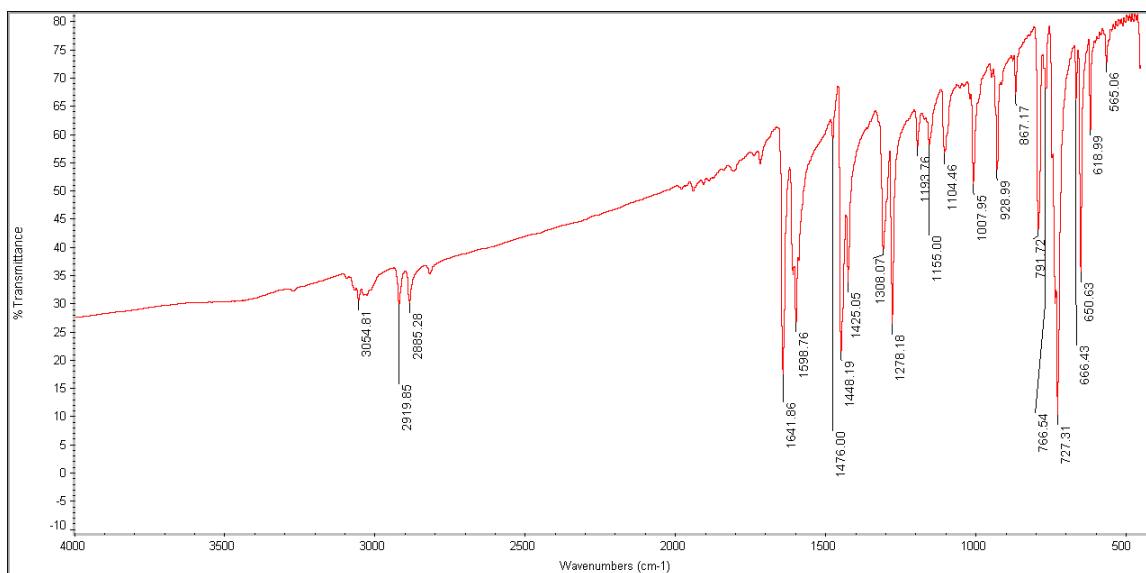

Fig S7. IR spectrum of the ligand flen in KBr disk.

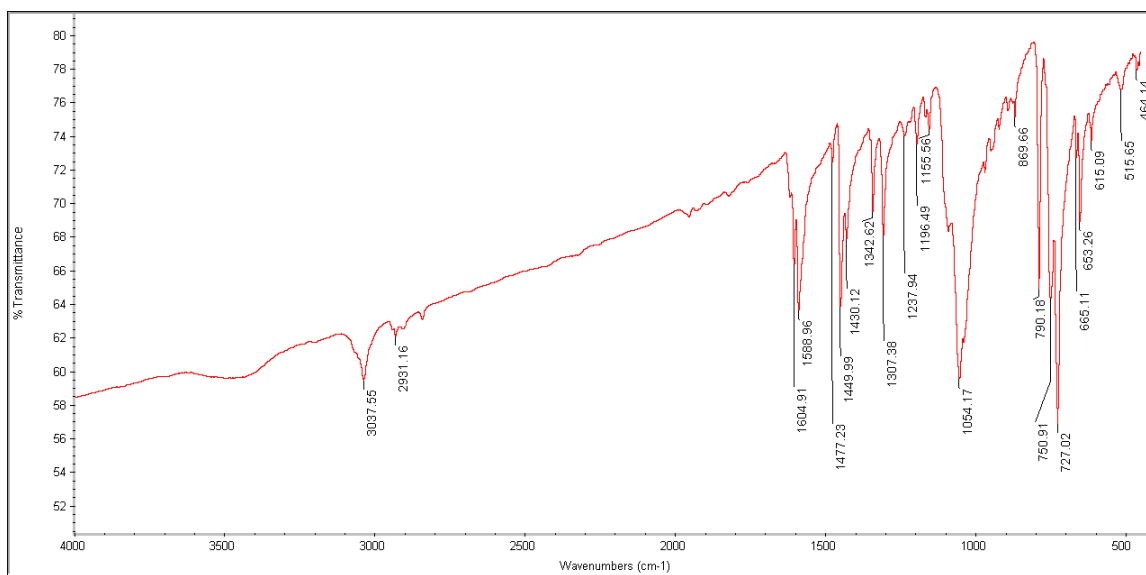

Fig S8. IR spectrum of compound 1 in KBr disk.

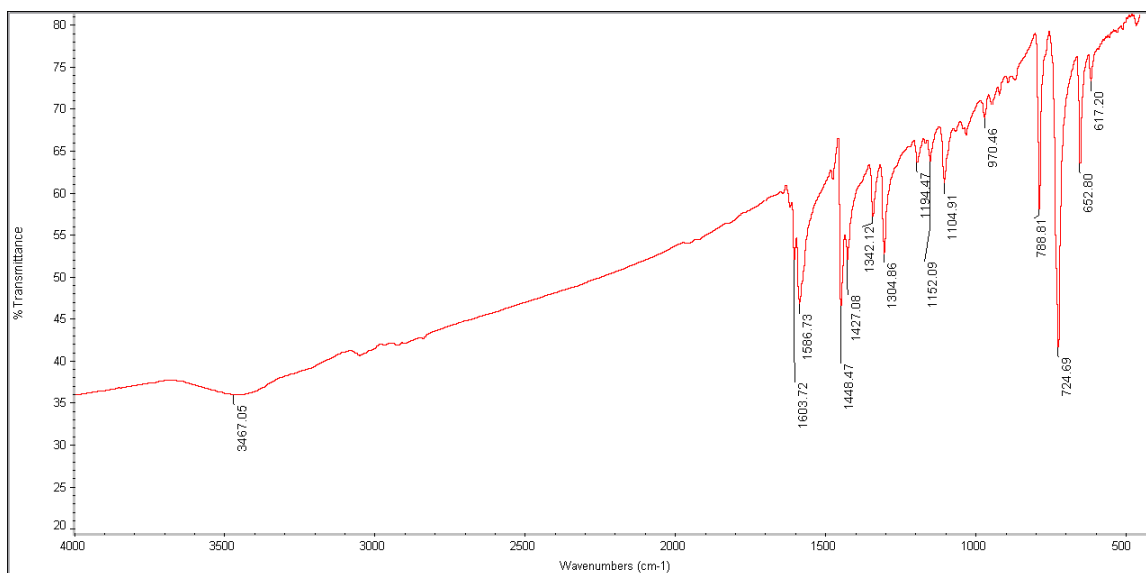

**Fig S9.** IR spectrum of compound **2** in KBr disk.
